# Supplementary material
Source: PubMed Central journal article supplement (PMC4642884)

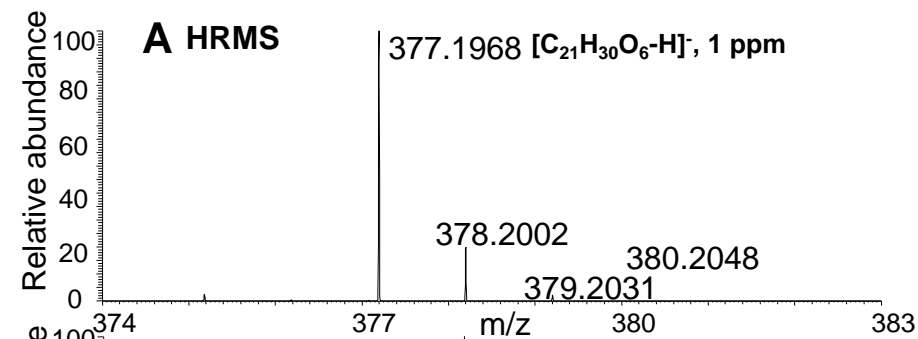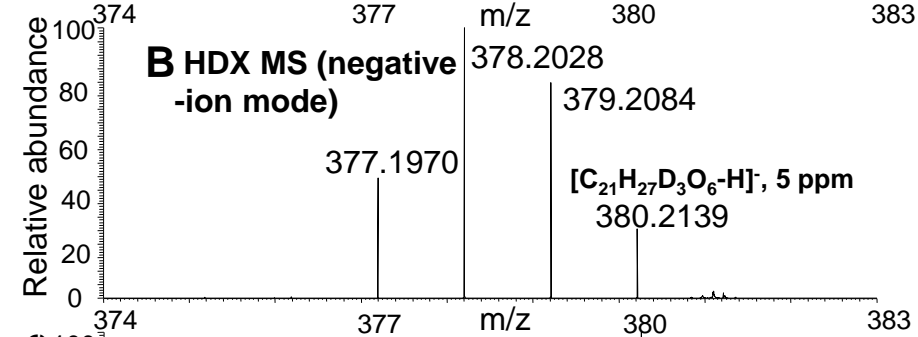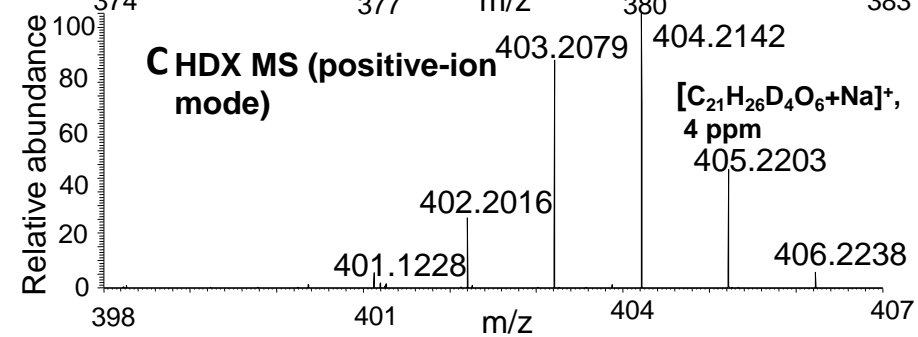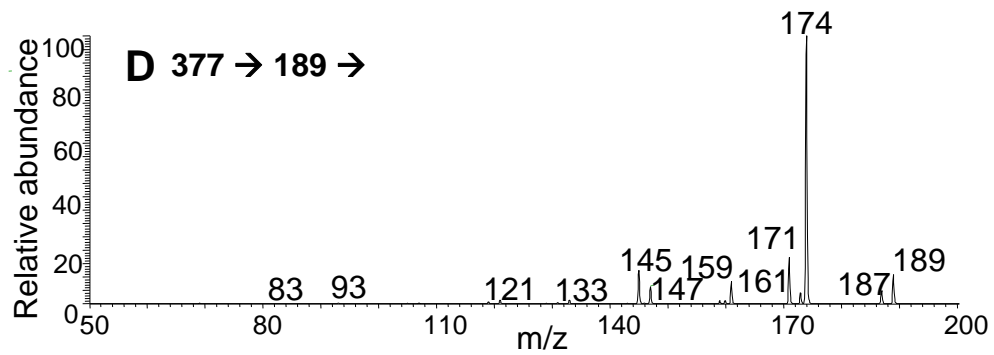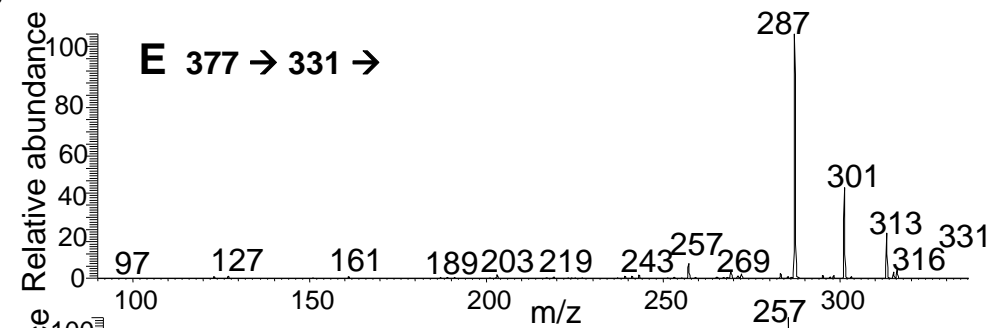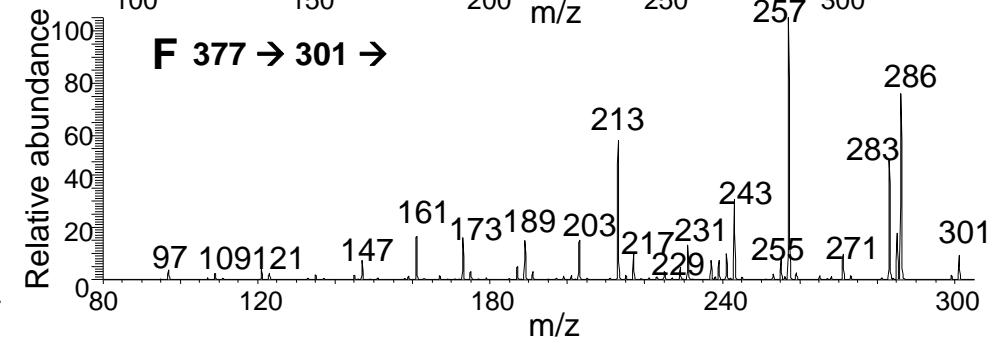

Supplement: NIHMS727567-supplement-5.pdf [file NIHMS727567-supplement-5.pdf]

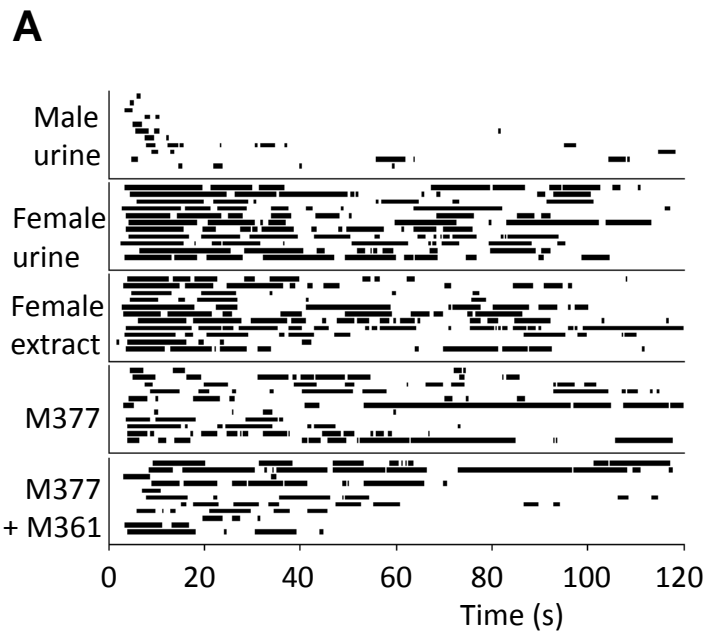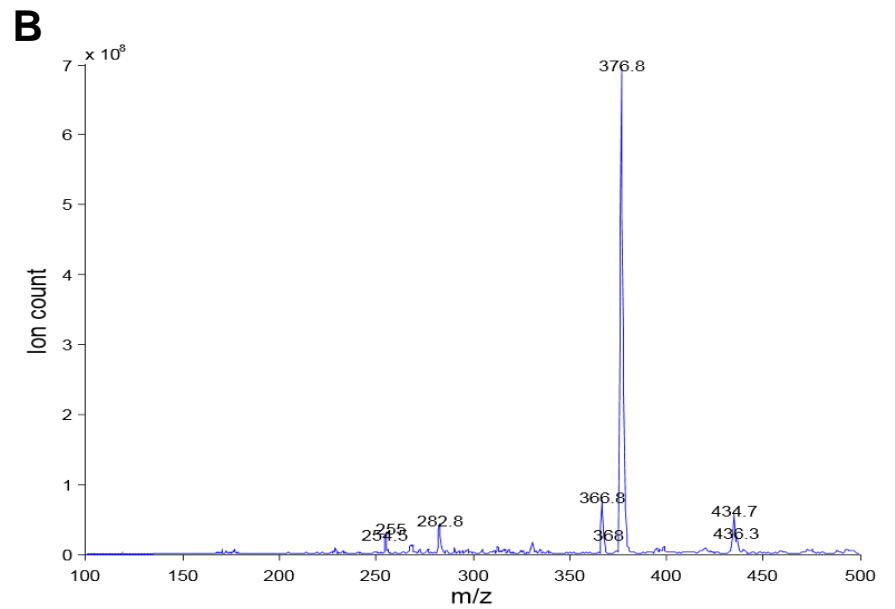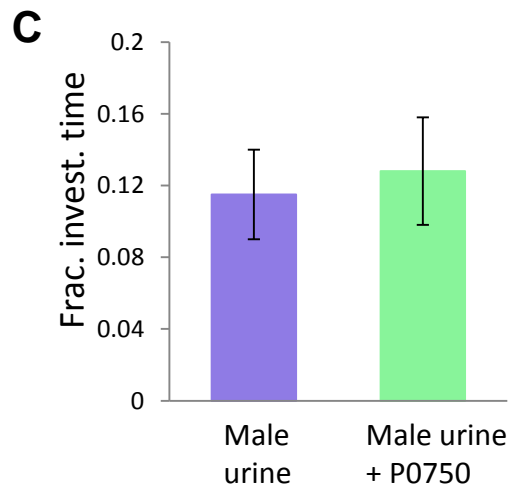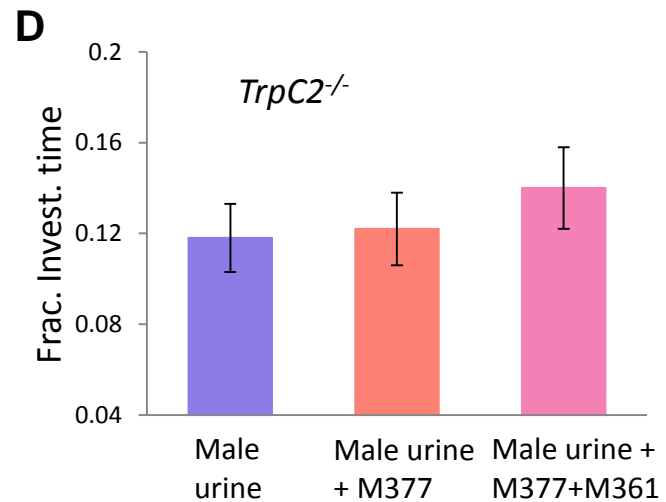

Supplement: NIHMS727567-supplement-6.pdf [file NIHMS727567-supplement-6.pdf]
